# Supplementary material for: Copper and conjugated carbonyls of metal–organic polymers as dual redox centers for Na storage
Source: Royal Society of Chemistry journal article supplement (doi:10.1039/d3sc05023h), 2024-01-01
Supplement: d3sc05023h1.pdf [file d3sc05023h1.pdf]

1                    **Electronic Supplementary Information (ESI)**

2

3                    **Copper and Conjugated Carbonyls of Metal-organic Polymer as**

4                    **Dual Redox Centers for Na Storage**

5 Liubin Wang,<sup>a\*</sup> Ningbo Liu,<sup>a</sup> Xiaoying Zhao,<sup>a</sup> Xiaohan Wang,<sup>a</sup> Tong Zhang,<sup>c</sup> Zhiqiang  
6 Luo,<sup>b\*</sup> and Fujun Li<sup>c\*</sup>

7 <sup>a</sup>College of Chemistry & Materials Science, Key Laboratory of Analytical Science and  
8 Technology of Hebei Province, Hebei University, Baoding 071002, China

9 <sup>b</sup>Tianjin Key Lab for Photoelectric Materials & Devices, School of Materials Science  
10 and Engineering, Tianjin University of Technology, Tianjin 300384, China

11 <sup>c</sup>Frontiers Science Center for New Organic Matter, Key Laboratory of Advanced  
12 Energy Materials Chemistry (Ministry of Education), Renewable Energy Conversion  
13 and Storage Center (RECAST), College of Chemistry, Nankai University. Tianjin  
14 300071, China

15

16

## 1 **Experimental**

2 **Materials:** Potassium phthalimide (Sigma-Aldrich, 98.0%), Tetrachloro-p-  
3 benzoquinone (Aladdin, 98%), dimethyl sulfoxide (DMSO, Aladdin, 99.5%),  
4 N,N-Dimethylformamide (DMF, Aladdin, 99.5%), hydrazine hydrate (Heowns,  
5 80.0wt%),  $\text{Cu}(\text{NO}_3)_2 \cdot 3\text{H}_2\text{O}$  (Aladdin, 99%), acetonitrile (Macklin, 99.5%), and  
6 ammonia solution (Damao, 25%) were purchased and used without further  
7 purification. Tetramino-benzoquinone (TABQ) was synthesized through two-  
8 step reactions according to the literature.<sup>S1</sup>

9 **Synthesis of Cu-TABQ:** Cu-TABQ was synthesized by a simple solution method  
10 (Fig. S1).  $\text{Cu}(\text{NO}_3)_2 \cdot 3\text{H}_2\text{O}$  (1mmol) was dissolved in 30 mL DMSO and 3 mL of  
11 concentrated aqueous ammonia (~14 M), after that, it was added to DMSO  
12 solution with 1mmol TABQ under vigorous stirring. The reaction was kept with  
13 stirring for 3 h under ambient air at 30°C, 60°C, and 90°C, respectively. The solid  
14 was thoroughly washed with deionized  $\text{H}_2\text{O}$ , DMSO, and acetone several times,  
15 and then dried at 90 °C in an oven for 12 h. Finally, Cu-TABQ with different  
16 morphologies was obtained.

17 **Material Characterization:** Powder X-ray diffraction (XRD, Rigaku  
18 MiniFlex600 X-ray generator, Cu  $\text{K}\alpha$  radiation,  $\lambda = 1.5406 \text{ \AA}$ ) and high-  
19 resolution transmission electron microscopy (HRTEM) (Taols F200X G2,  
20 AEMC) were applied to investigate the crystallinity of the Cu-TABQ powder.  
21 The spectroscopic characteristics of Cu-TABQ were revealed with Fourier  
22 transform infrared spectroscopy (FTIR, ThermoFisher Scientific Nicolet iS10),  
23 Raman spectroscopy (Raman, HORIBA, LabRAM HR Evolution) with a laser  
24 wavelength of 532 nm, X-ray photoelectron spectroscopy (XPS, Perkin Elmer  
25 PHI 1600 ESCA, Perkin-Elmer) and solid-state  $^1\text{H}$  NMR with Inova 400MHz  
26 Spectrometer (Varian Inc., USA). In XPS spectra of materials, all binding  
27 energies were corrected using carbon element with a binding energy of C 1s =  
28 284.6 eV as an internal standard. X-band electron paramagnetic resonance (EPR)  
29 spectra were obtained on a Bruker EMS nano spectrometer at room temperature.

1 Scanning electron microscopy (SEM, JEOL JSM-7500F) and transmission  
2 electron microscope (TEM, FEI TECNAI G2) were used to observe the crystal  
3 morphologies and microstructures with elemental mapping, and N<sub>2</sub>  
4 adsorption/desorption measurement (Quantachrome Autosorb-iQ-MP).  
5 Thermogravimetric analysis (TGA) was evaluated on TG/DTA STA449C  
6 thermal analyzer in airflow at a heating rate of 10 °C min<sup>-1</sup> from ambient  
7 temperature to 800 °C.

8 ***Electrochemical measurements:*** The electrochemical performance of Cu-TABQ  
9 electrode was tested by Galvanostatic charge/discharge, cyclic voltammetry  
10 (CV), and rate, which were proved by CR2032-type coin cells at room  
11 temperature. The glass microfiber membrane (Whatman GF/D, Aldrich), 1.0 M  
12 NaPF<sub>6</sub>/DEGDME solution, and sodium foil were used as the separator, the  
13 electrolyte, and the anode, respectively. The preparation of Cu-TABQ working  
14 electrode was mixing Cu-TABQ, conductive carbon (Super P), and  
15 polyvinylidene fluoride (PVDF) at the weight ratio of 8: 1: 1 with anhydrous N-  
16 methyl-2-pyrrolidinone (NMP) solvent, the following pasted onto Al foil and  
17 drying at 80 °C in a vacuum oven for 12 h. The batteries were assembled in a  
18 glove box filled with an argon atmosphere (water and oxygen level under 1.0  
19 ppm). Galvanostatic charge/discharge was performed on the LAND-CT2001A  
20 battery instrument (LAND Electronic Co., Wuhan China) between a voltage  
21 range of 1.0-3.0 V (vs. Na<sup>+</sup>/Na) at room temperature. Cyclic voltammetry (CV)  
22 was conducted on the CHI 760E electrochemical workstation.

23 ***Computational details and Calculation of diffusion kinetics:***

24 DFT calculations were performed using the Vienna Ab-initio Simulation Package  
25 (VASP).<sup>S2, S3</sup> The generalized gradient approximation (GGA) with the Perdew-Burke-  
26 Ernzerhof (PBE) functional was adopted to describe the electronic exchange and  
27 correlation effects.<sup>S4, S5</sup> The cutoff energy was set to 450 eV for both geometry  
28 optimization and self-consistent field computation. The convergence criterion of the  
29 total energy and force was set to 10<sup>-5</sup> eV and 0.02 eV Å<sup>-1</sup>, respectively. In the GITT  
30 test, the current pulse lasted for 20 min at 50 mA g<sup>-1</sup> and then the cell was relaxed for

1 80 min to make the voltage reach the equilibrium. These procedures were repeatedly  
2 applied to the cell during the entire discharge/charge process. The Na<sup>+</sup> diffusion  
3 coefficients in the Cu-TABQ cathode were calculated from the GITT data by following  
4 formula <sup>S6</sup>:

$$5 \quad D_{GITT} = \frac{4}{\pi} \left( \frac{m_B V_m}{M_B S} \right)^2 \left( \frac{\Delta E_s}{\tau (dE_\tau / d\sqrt{\tau})} \right)^2 \approx \frac{4}{\pi \tau} \left( \frac{m_B V_m}{M_B S} \right)^2 \left( \frac{\Delta E_s}{\Delta E_\tau} \right)^2 \left( \tau \ll \frac{L^2}{D_{GITT}} \right)$$

6 Where  $D_{Na^+}$  (cm<sup>2</sup> s<sup>-1</sup>) means the chemical diffusion coefficient,  $\tau$  is the constant current  
7 duration time (20 min),  $m_B$  is the mass of active material,  $M_B$  is the molecular weight  
8 (g mol<sup>-1</sup>) and  $V_m$  is its molar volume (cm<sup>3</sup> mol<sup>-1</sup>),  $S$  is the total contacting area of  
9 electrode with electrolyte (1.1304 cm<sup>2</sup>), and  $\Delta E_s$  and  $\Delta E_\tau$  are the change in the steady  
10 state voltage and overall cell voltage after the application of a current pulse in a single  
11 step GITT experiment, respectively.

12

1

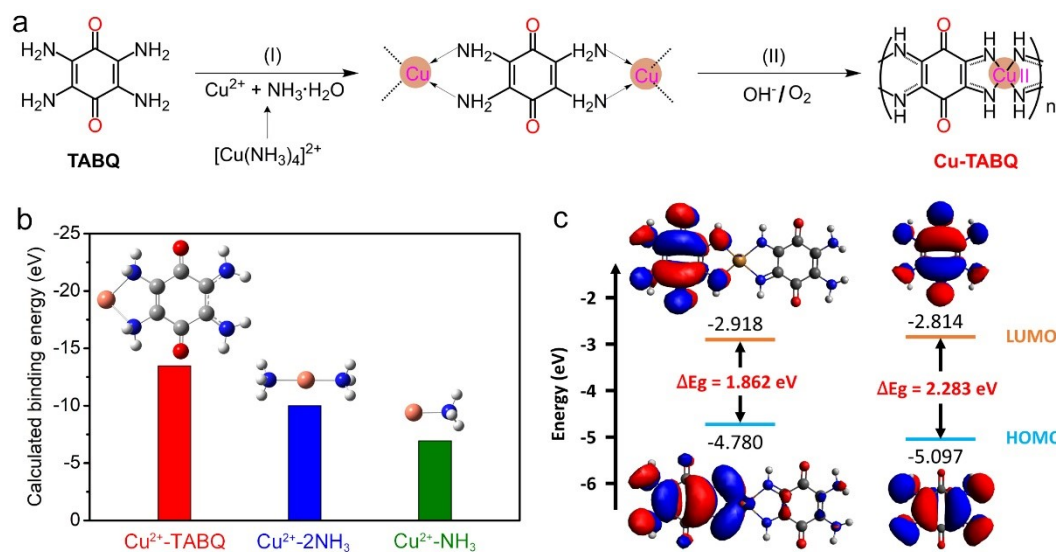

2

3 **Fig. S1** (a) Schematic diagram of possible formation of Cu-TABQ; (b) the calculated  
 4 binding energies of  $\text{Cu}^{2+}$ -TABQ,  $\text{Cu}^{2+}$ -2 $\text{NH}_3$ , and  $\text{Cu}^{2+}$ - $\text{NH}_3$ ; (c) HOMO/LUMO  
 5 energy levels and orbits distributions of Cu-TABQ and TABQ.

6 The dissociated  $\text{Cu}^{2+}$  from  $[\text{Cu}(\text{NH}_3)_4]^{2+}$  coordinated with the amidogen of the TABQ  
 7 molecule and then stabilized by oxidative dehydrogenation under the assistance of  $\text{O}_2$   
 8 and  $\text{OH}^-$ . Then, the coordination chains extend to grow with the slow release of  $\text{Cu}^{2+}$   
 9 from  $[\text{Cu}(\text{NH}_3)_4]^{2+}$  to form Cu-TABQ. Density functional theory (DFT) is employed to  
 10 analyse the lowest unoccupied molecular orbital (LUMO) and highest occupied  
 11 molecular orbital (HOMO) energy levels of Cu-TABQ and TABQ in Figure S1c. A  
 12 higher HOMO value represents a lower ionization potential and better reducibility. The  
 13 lower LUMO value expresses better electron acceptance and excellent oxidation  
 14 capability. Meanwhile, the smaller LUMO-HOMO gap ( $\Delta E_g$ ) means an enhanced  
 15 electronic delocalization. Compared with TABQ, Cu-TABQ presents lower LUMO  
 16 energy level and narrow HOMO-LUMO energy gap ( $\Delta E_g$ ), indicating the increased  
 17 electron-accepting capability, thus resulting in the desirable electrochemical  
 18 performance.

19

1

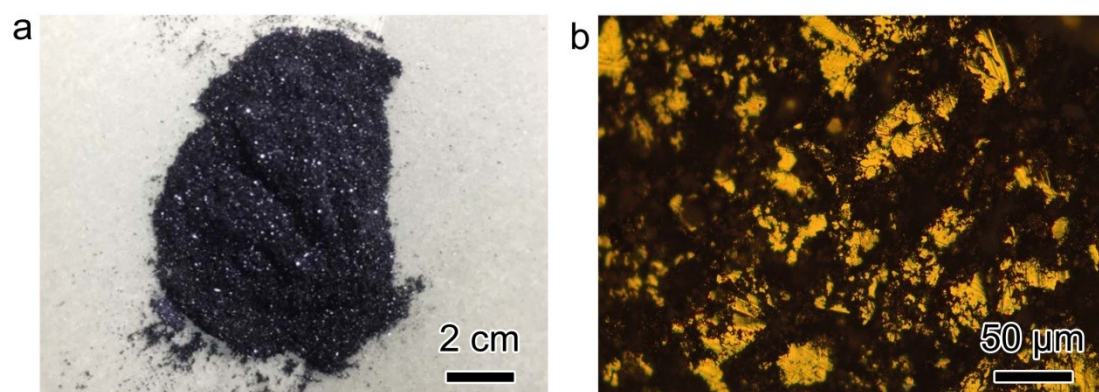

3 **Fig. S2** Optical pictures of Cu-TABQ powders.

4

1

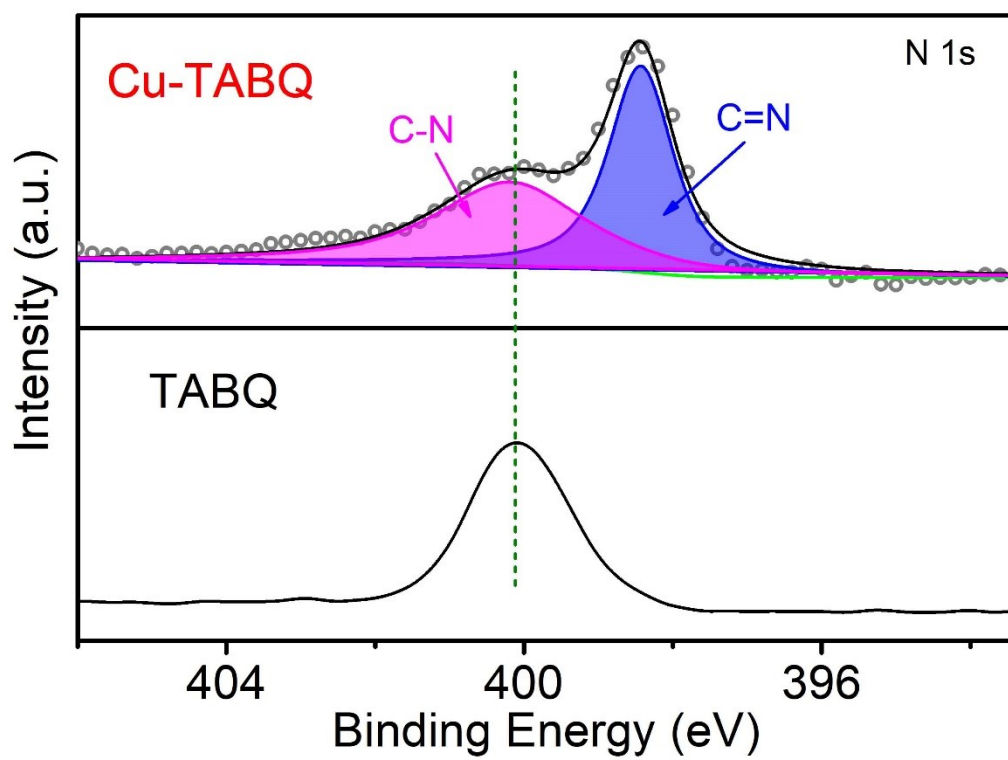

2

3 **Fig. S3** N 1s XPS spectra of Cu-TABQ and TABQ.

4

1

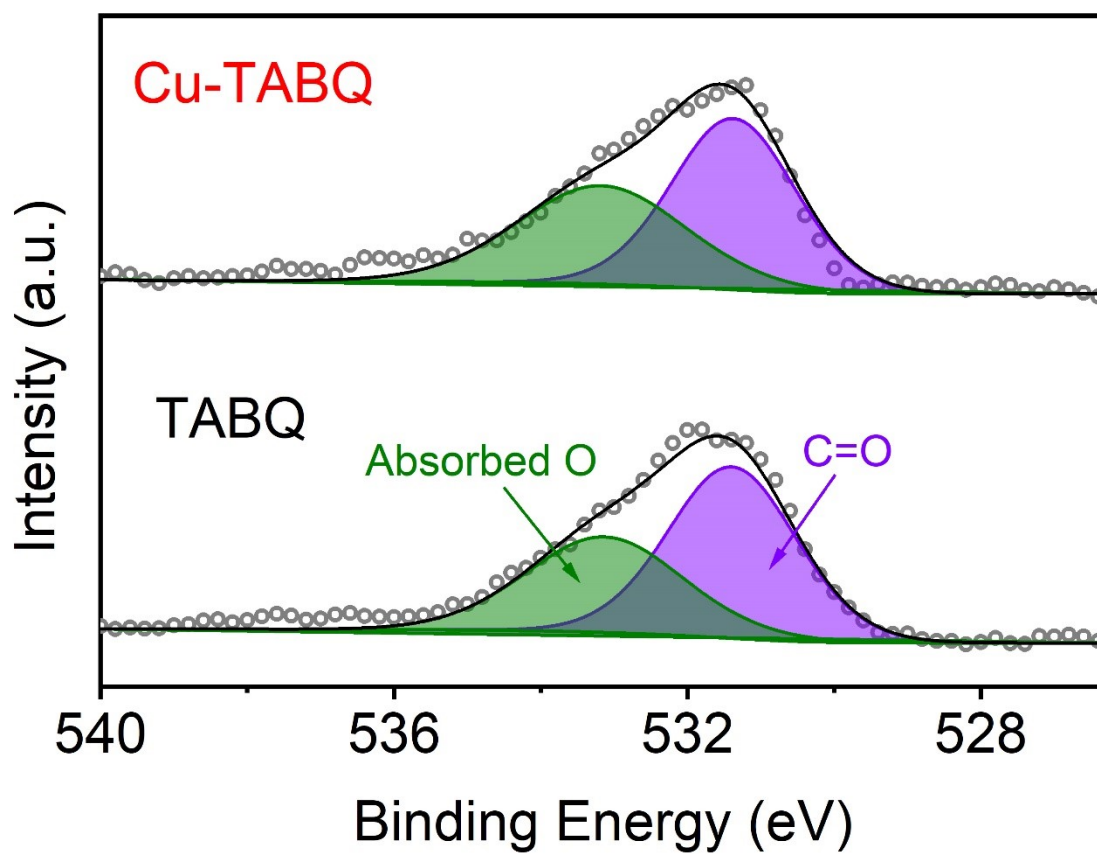

2

3 **Fig. S4** O 1s XPS spectra of Cu-TABQ and TABQ.

4



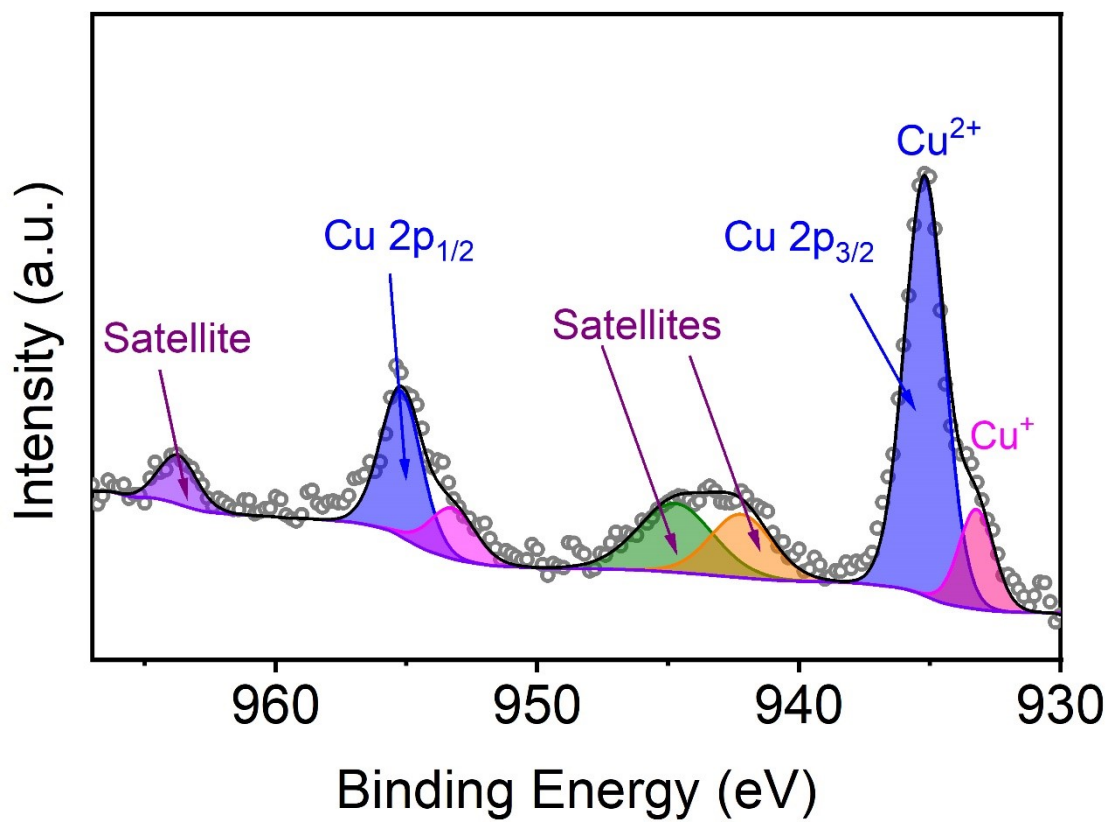

1

2 **Fig. S5** Cu 2p XPS spectra of Cu-TABQ.

3

1

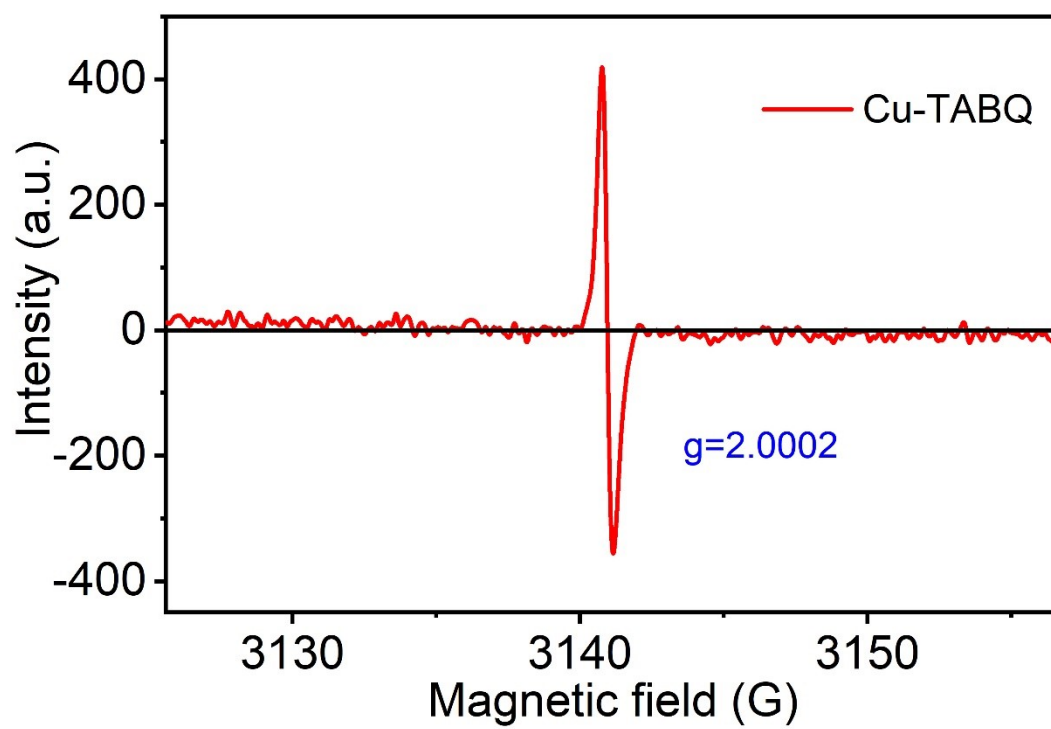

2

3 **Fig. S6** EPR spectra of Cu-TABQ.

4

1

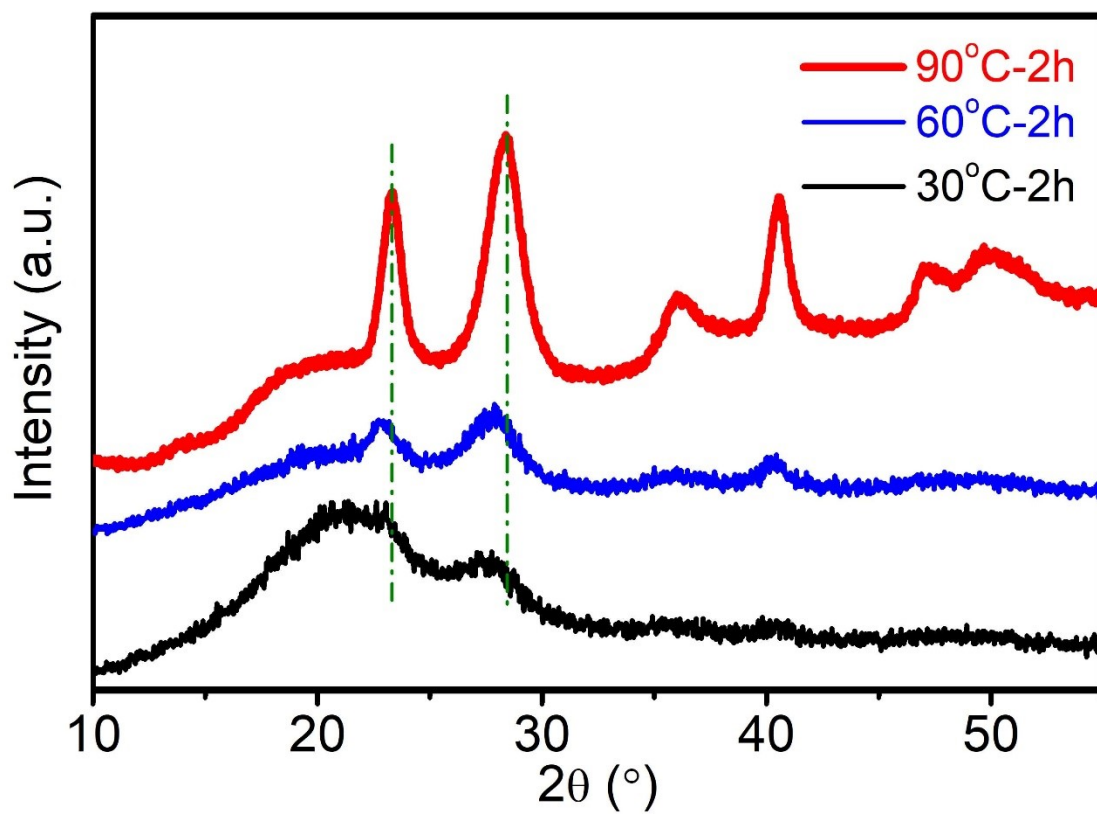

2

3 **Fig. S7** XRD patterns of Cu-TABQ prepared at different reaction conditions.

4

5

1

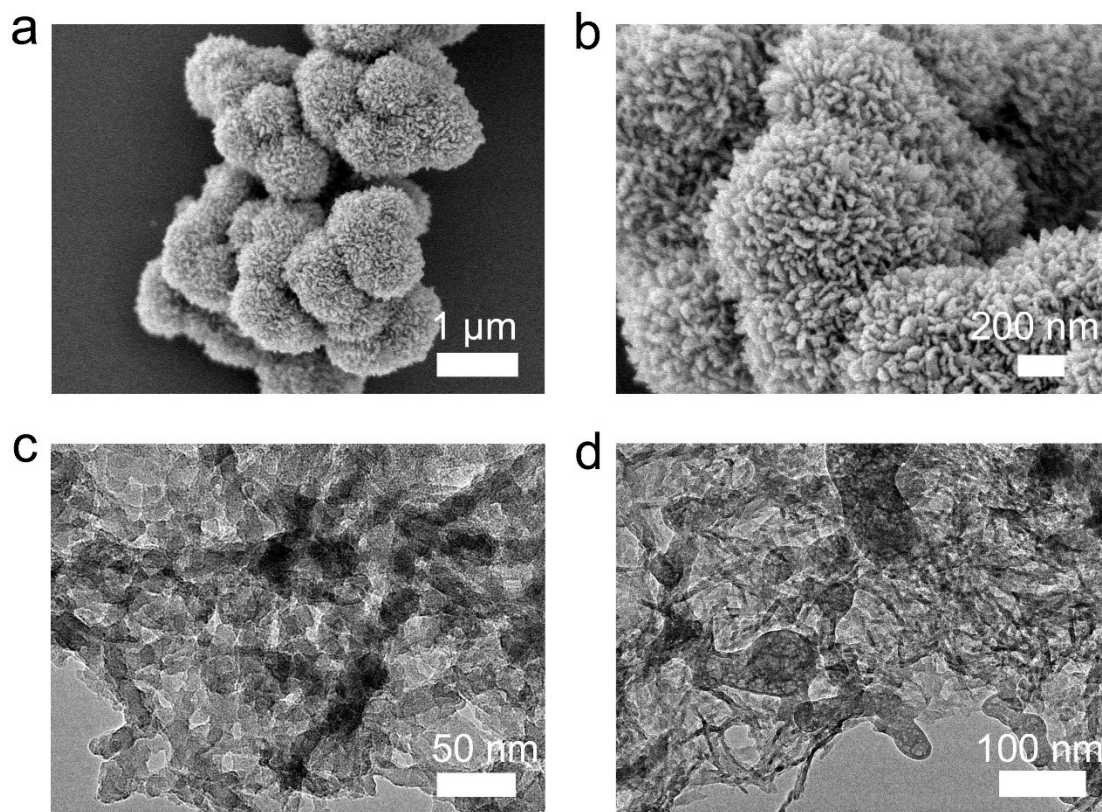

2

3 **Fig. S8** (a,b) SEM and (c,d) TEM images of Cu-TABQ obtained at room temperature  
4 (30 °C).

5

1

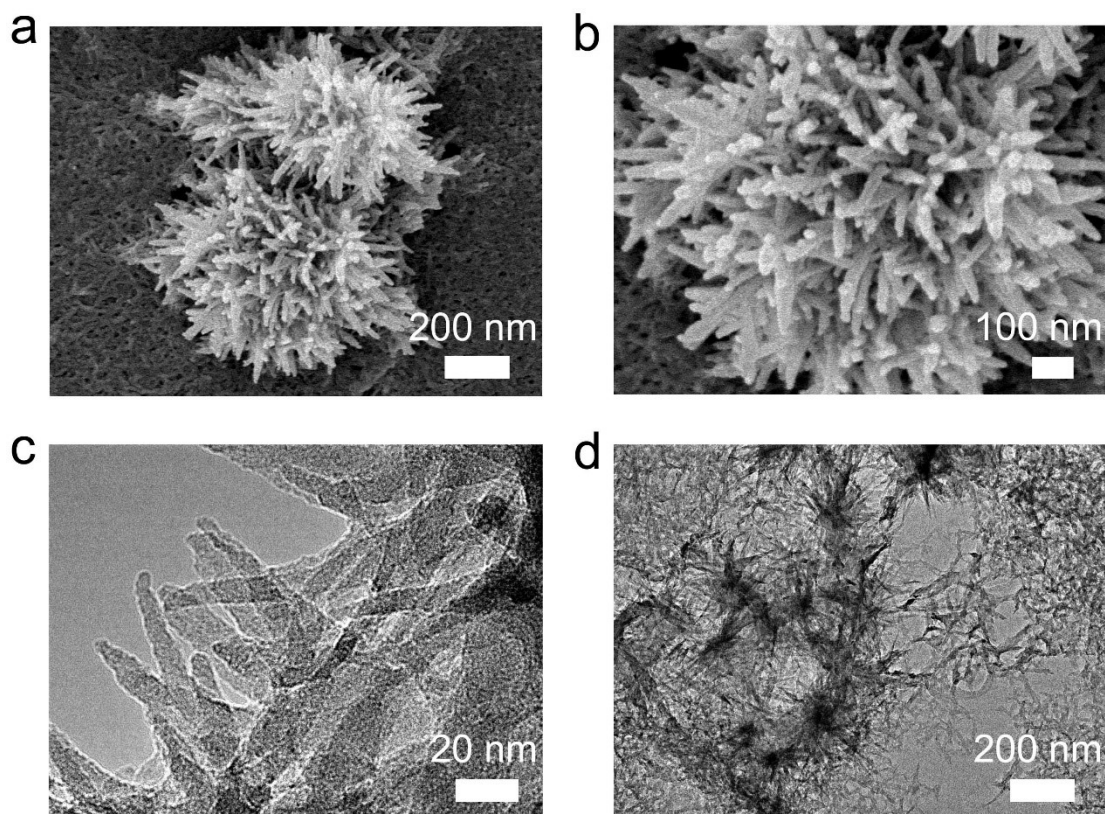

2

3 **Fig. S9** (a,b) SEM and (c,d) TEM images of Cu-TABQ obtained via reaction at 60 °C.

4

1

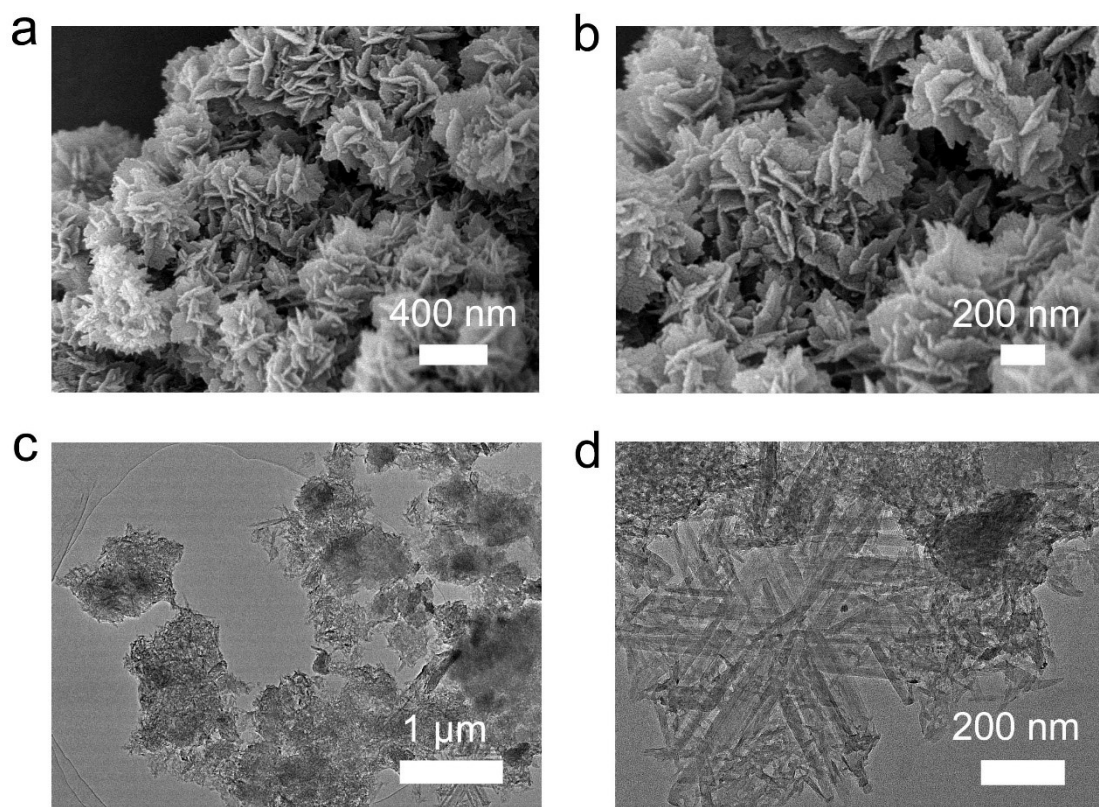

2

3 **Fig. S10** (a,b) SEM and (c,d) TEM images of Cu-TABQ obtained at 90 °C.

4

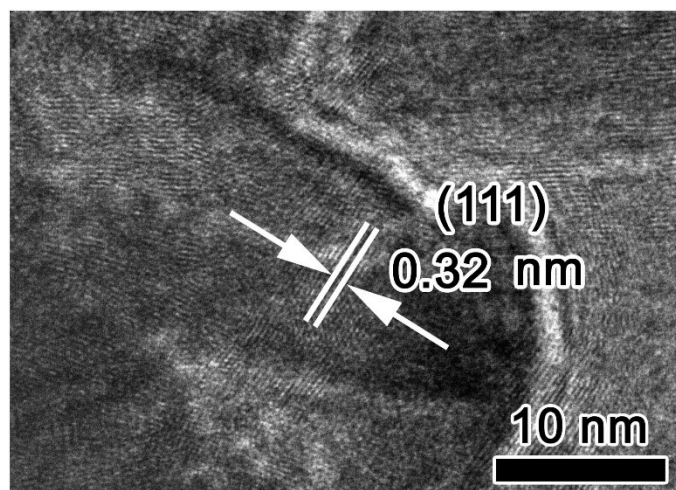

1

2 **Fig. S11** HRTEM image of Cu-TABQ.

3

1

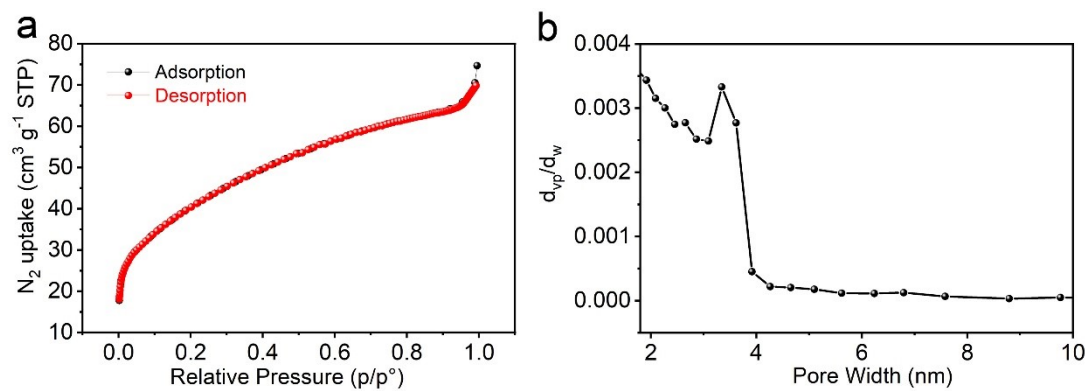

2

3 **Fig. S12** (a) N<sub>2</sub> adsorption isotherm and (b) pore size distribution analysis of the Cu-  
4 TABQ.

5



1

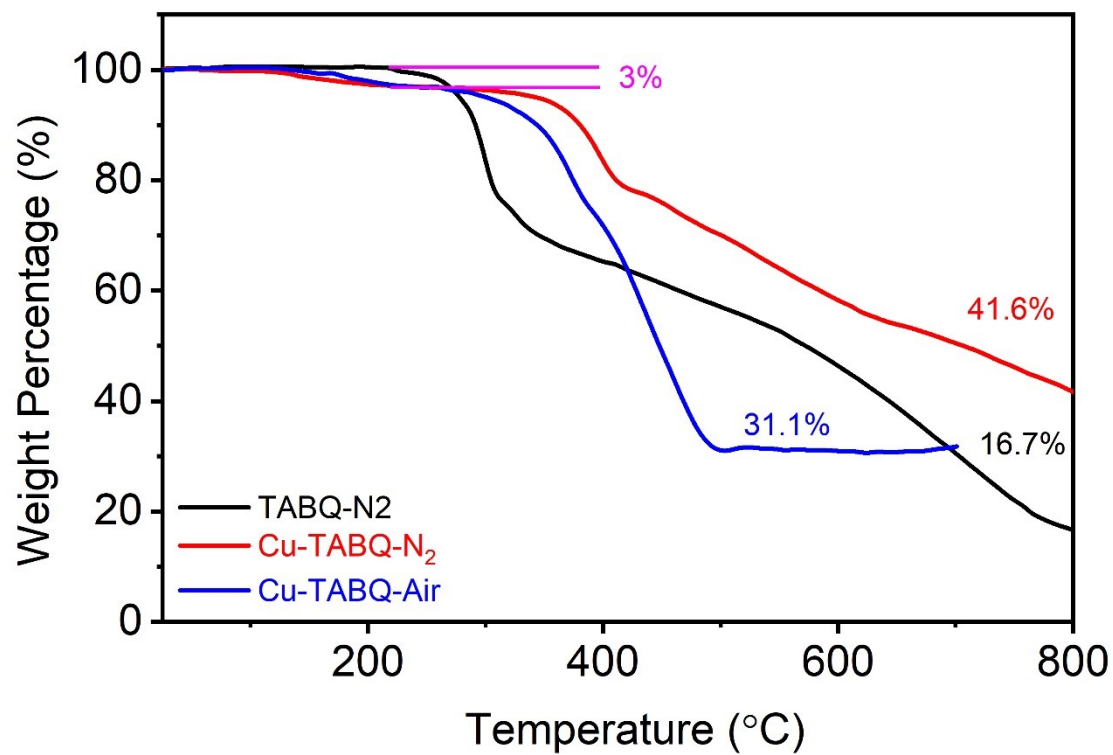

2

3 **Fig. S13** TGA characterization of Cu-TABQ and TABQ.

4

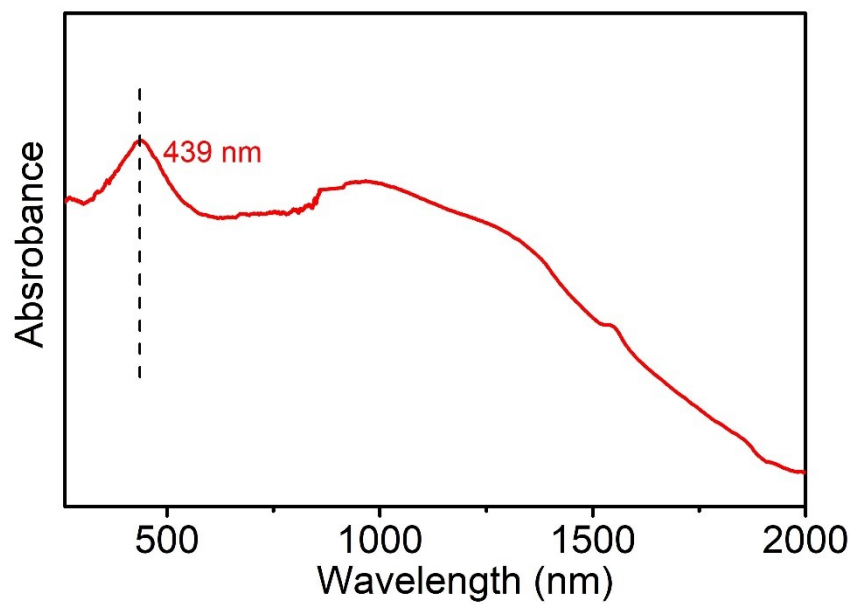

1

2 **Fig. S14.** UV-vis spectrum of Cu-TABQ.

3

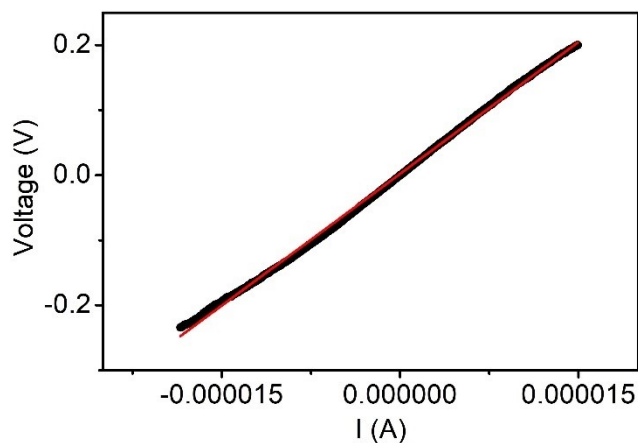

1

2 **Fig. S15.** Linear I-V curves of Cu-TABQ.

3 The electric conductivity was measured by using I-V curves, where the Cu-TABQ  
4 powder was pressed into pellets as the electrode. Based on  $R = U/I = 1/\sigma \times L/A$ , where  
5  $R$  is resistance of Cu-TABQ pellet (the slope in I-V curves),  $\sigma$  is electric conductance,  
6  $L = 0.069$  cm is thickness of the pellet,  $A = 0.5024$  cm<sup>2</sup> is cross-sectional area of the  
7 pellet. The resistance of the Cu-TABQ pellet is 13506  $\Omega$ . Thus, the electric conductivity  
8 of Cu-TABQ is calculated to be  $1.02 \times 10^{-3}$  S m<sup>-1</sup>.

9

1

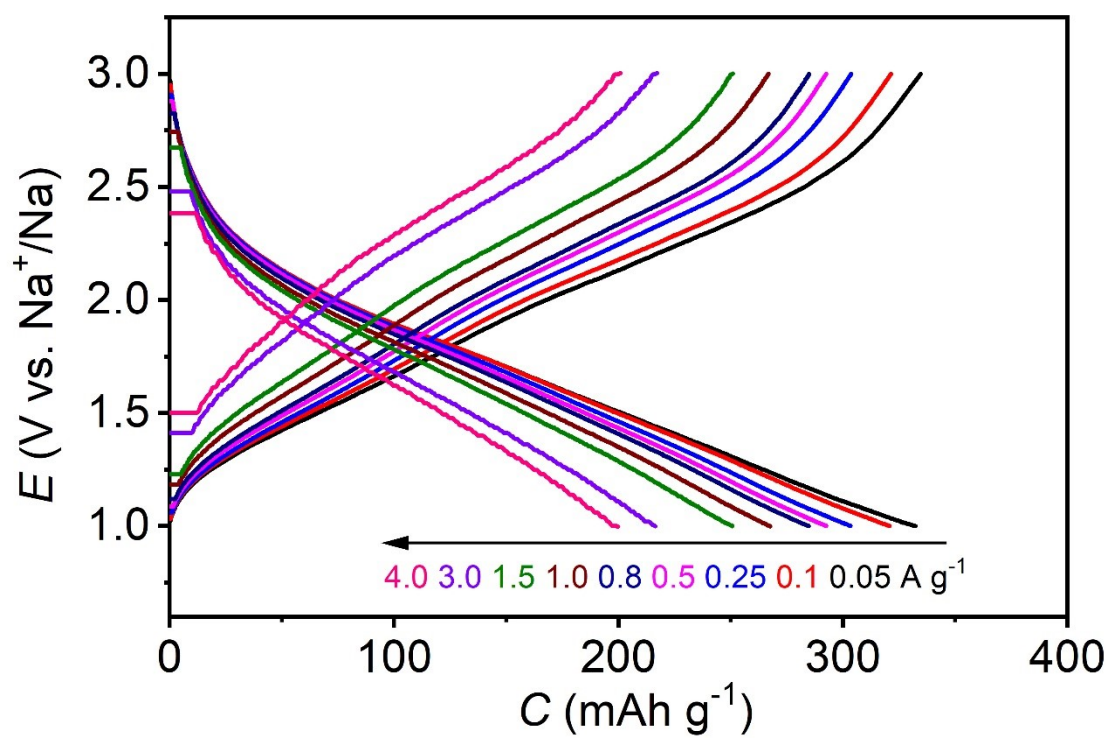

2

3 **Fig. S16** Charge/discharge curves at different current densities.

4

5

1

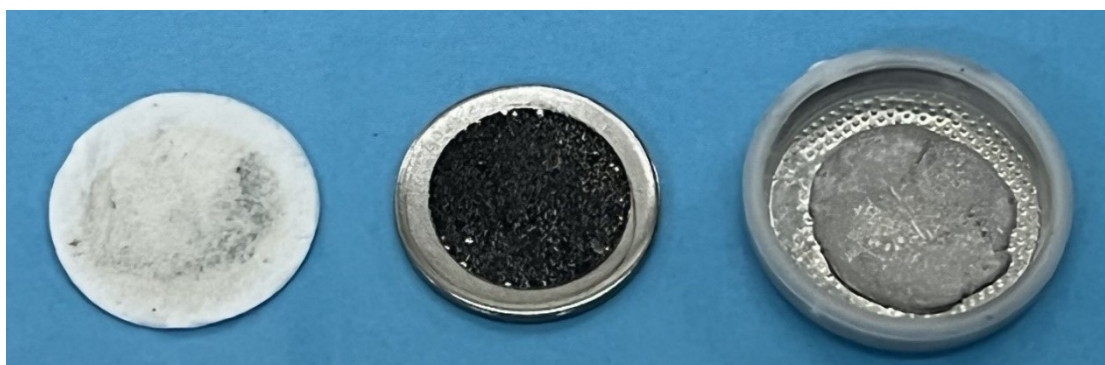

2

3 **Fig. S17** Digital photos of the disassembled Na//Cu-TABQ after 200 cycles.

4

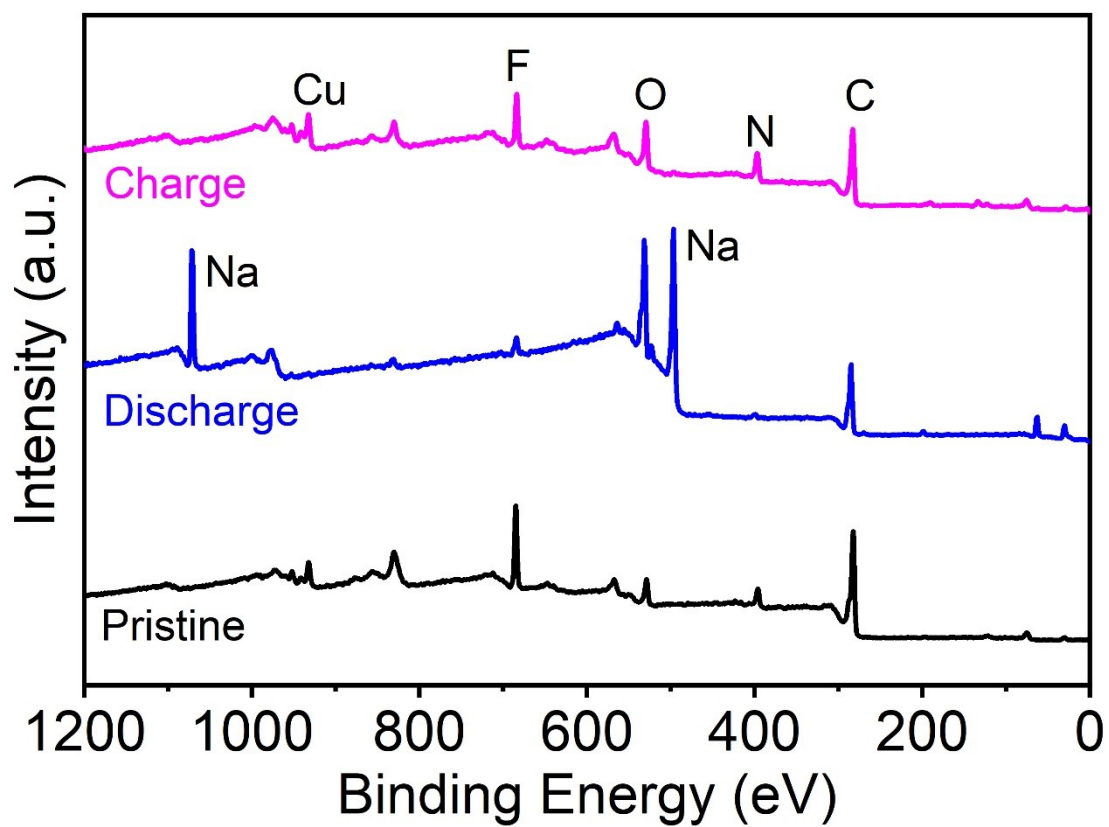

1  
2  
3  
4

**Fig. S18** Full XPS spectra of Cu-TABQ in the first discharge and charge processes.

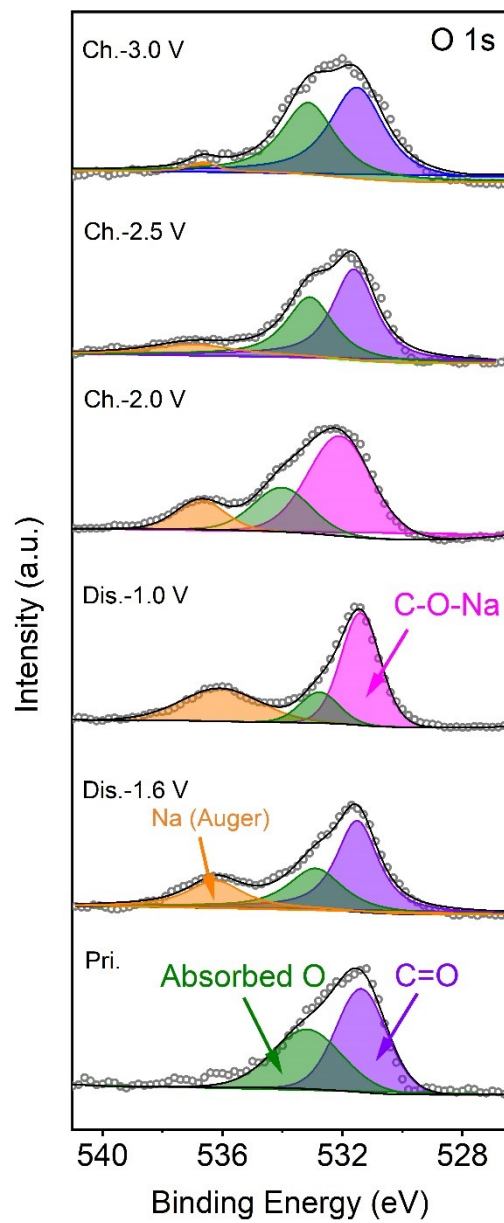

1

2 **Fig. S19** *Ex-situ* O 1s XPS spectra of Cu-TABQ in the first discharge and charge  
3 processes.

4

5

1

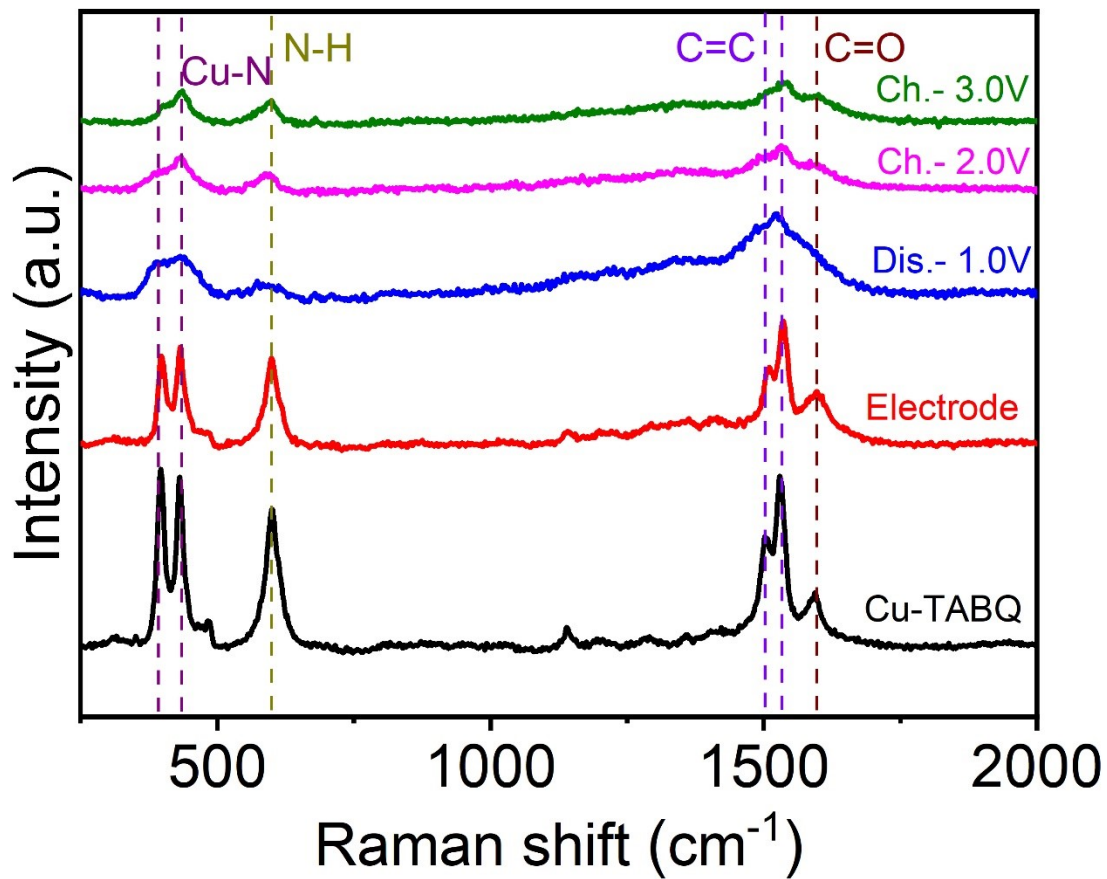

2

3

4 **Fig. S20** *Ex-situ* Raman spectra of the Cu-TABQ electrode in the first discharge and  
5 charge process.

6



1

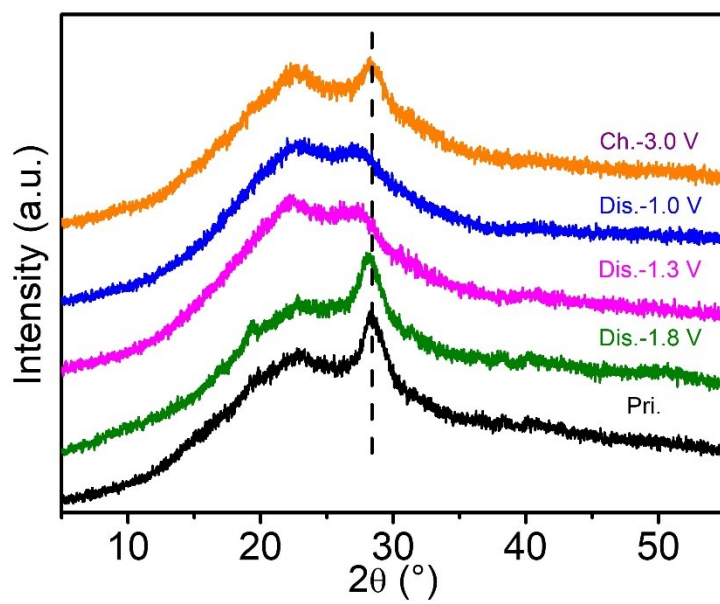

2

3 **Fig. S21.** XRD patterns of the Cu-TABQ electrode during the first cycle.

4

5

1

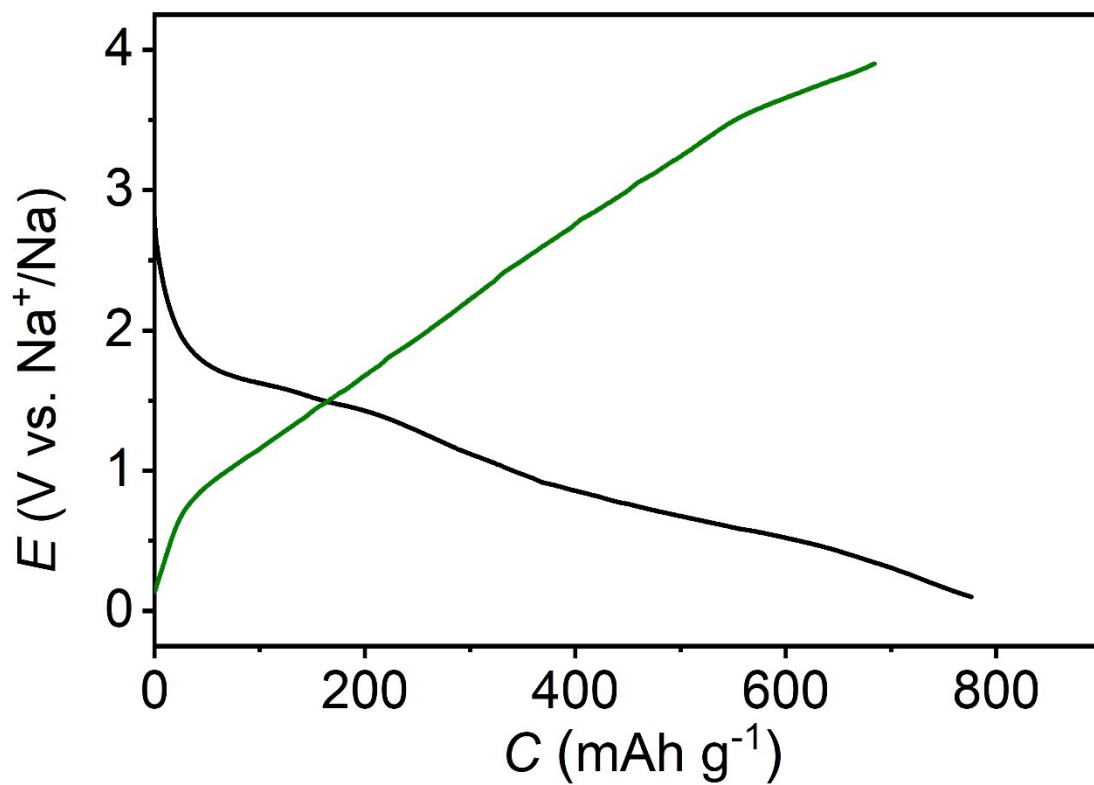

2

3

4 **Fig. S22** Discharge/charge curves of the first cycle at 50 mA g<sup>-1</sup> in the voltage range  
5 from 0.1 to 3.9 V.

6

7

8

1

2

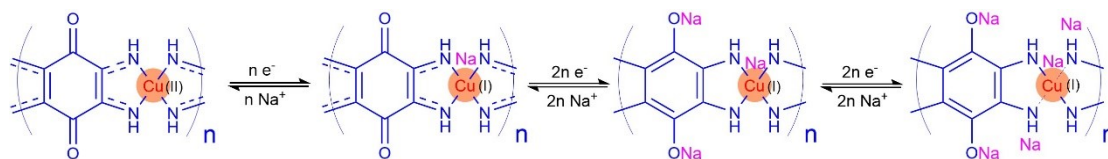

3

4

5 **Fig. S23** Schematic diagram of insertion/extraction of Na<sup>+</sup> in Cu-TABQ in the voltage  
6 range from 0.1 to 3.9 V.

7

8

9

10

1

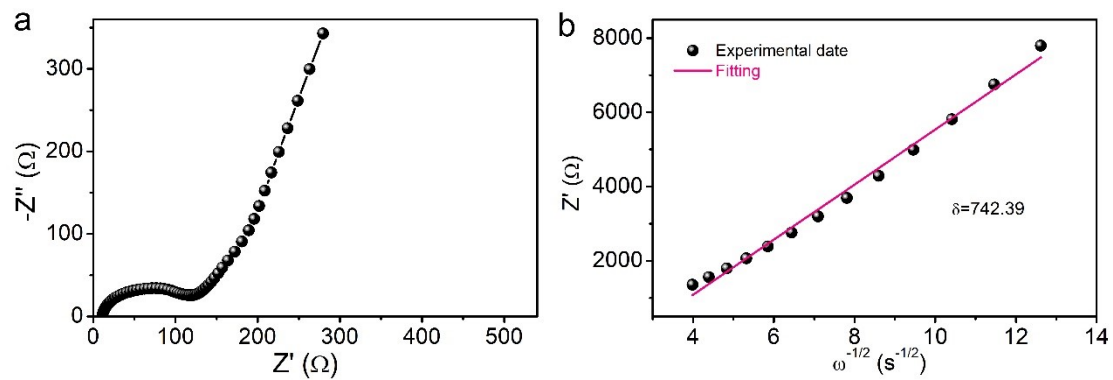

2

3 **Fig. S24** EIS spectrum of Cu-TABQ at open-circuit voltage before test; (b) Relationship  
4 between  $Z'$  and  $\omega^{-1/2}$  in the low-frequency of EIS of Cu-TABQ at open-circuit voltage  
5 before test.

6

1 **Table S1.** Atomic coordinates of Cu-TABQ.

2

| atom | occ. | site | x       | y       | z       |
|------|------|------|---------|---------|---------|
| C1   | 1    | 1a   | 0.28329 | 0.60239 | 0.89772 |
| C2   | 1    | 1a   | 0.71671 | 0.39761 | 0.10228 |
| C3   | 1    | 1a   | 0.39761 | 0.71671 | 0.10228 |
| C4   | 1    | 1a   | 0.60239 | 0.28329 | 0.89772 |
| C5   | 1    | 1a   | 0.38332 | 0.38332 | 0.78098 |
| C6   | 1    | 1a   | 0.61668 | 0.61668 | 0.21902 |
| H1   | 1    | 1a   | 0.99471 | 0.64473 | 0.67734 |
| H2   | 1    | 1a   | 0.00529 | 0.35527 | 0.32266 |
| H3   | 1    | 1a   | 0.35527 | 0.00529 | 0.32266 |
| H4   | 1    | 1a   | 0.64473 | 0.99471 | 0.67734 |
| N1   | 1    | 1a   | 0.08552 | 0.71179 | 0.83319 |
| N2   | 1    | 1a   | 0.91448 | 0.28821 | 0.16681 |
| N3   | 1    | 1a   | 0.28821 | 0.91448 | 0.16681 |
| N4   | 1    | 1a   | 0.71179 | 0.08552 | 0.83319 |
| O1   | 1    | 1a   | 0.28606 | 0.28606 | 0.59362 |
| O2   | 1    | 1a   | 0.71394 | 0.71394 | 0.40638 |
| Cu1  | 1    | 1a   | 0       | 0       | 0       |

Triclinic, a=6.98253 Å, b=6.98253 Å, c=3.22703 Å,  $\alpha=\gamma=92.2166^\circ$ ,  $\beta=67.5636^\circ$ ,  
V=145.2689 Å<sup>3</sup> ( $R_{wp} = 1.63\%$ ,  $R_p = 1.08\%$ ,  $\chi^2 = 1.89$ ).

3

4

1

2 **Table S2.** Elemental analysis (EA) results of Cu-TABQ.

| Weight ratio         |         | C%           | N%           | H%          | (Cu+O)%      |
|----------------------|---------|--------------|--------------|-------------|--------------|
| Theoretical results  |         | <b>31.64</b> | <b>24.61</b> | <b>1.76</b> | <b>41.99</b> |
| Experimental results | 30°C-2h | 31.56        | 23.23        | 2.44        | 42.77        |
|                      | 60°C-2h | 31.49        | 23.42        | 2.10        | 42.99        |
|                      | 90°C-2h | 31.38        | 23.71        | 2.31        | 42.6         |

3

4

5

1 **Table S3.** Comparison of electrochemical performance of Cu-TABQ sample with  
 2 reported Metal-organic cathodes in SIBs.

| Sample           | Voltage range [V vs. Na <sup>+</sup> /Na] | Discharge capacity[mAh g <sup>-1</sup> ]/Current density[mA g <sup>-1</sup> ] | Rate capability (mAh g <sup>-1</sup> ) | Capacity retention                                | Reference        |
|------------------|-------------------------------------------|-------------------------------------------------------------------------------|----------------------------------------|---------------------------------------------------|------------------|
| Zn-HHTP          | 0.5-3.5                                   | 150/100                                                                       | 60/8.0 A g <sup>-1</sup>               | 90% (1000 cycles)<br>0.1 A g <sup>-1</sup>        | S6               |
| Co-bqdc          | 0.01-2.5                                  | 264/100                                                                       | 178/1.0 A g <sup>-1</sup>              | 79% (1000 cycles)<br>0.1 A g <sup>-1</sup>        | S7               |
| Ni-TTO           | 1.2-3.2                                   | 140/100                                                                       | 118/5.0 A g <sup>-1</sup>              | 83% (100 cycles)<br>0.1 A g <sup>-1</sup>         | S8               |
| Cu-TAPT          | 1.0-3.8                                   | 313.4/100                                                                     | 152/5.0 A g <sup>-1</sup>              | 97% (250 cycles)<br>1.0 A g <sup>-1</sup>         | S9               |
| CuTCNQ           | 2.0-4.1                                   | 255/20                                                                        | /                                      | 89% (200 cycles)<br>0.05 A g <sup>-1</sup>        | S10              |
| Mn-DHBQ          | 0.01-2.5                                  | 261/100                                                                       | 129/2.0 A g <sup>-1</sup>              | 67% (500 cycles)<br>1.0 A g <sup>-1</sup>         | S11              |
| NiQAP            | 1.0-3.5                                   | 225.6/50                                                                      | 99.6/5.0 A g <sup>-1</sup>             | 91% (1000 cycles)<br>1.0 A g <sup>-1</sup>        | S12              |
| HATN-SCu         | 0.01-3.0                                  | 231/100                                                                       | 82/5.0 A g <sup>-1</sup>               | 100% (10000 cycles)<br>2.0 A g <sup>-1</sup>      | S13              |
| Co-HAB           | 0.5-3.0                                   | 291/50                                                                        | 152/12.0 A g <sup>-1</sup>             | 95% (150 cycles)<br>4.0 A g <sup>-1</sup>         | S14              |
| O- <i>p</i> NaPC | 0.01-2.0                                  | 140.7/100                                                                     | 56.9/2.0 A g <sup>-1</sup>             | 87% (200 cycles)<br>0.2 A g <sup>-1</sup>         | S15              |
| <b>Cu-TABQ</b>   | <b>1.0-3.0</b>                            | <b>322.9/50</b>                                                               | <b>198.8/4.0 A g<sup>-1</sup></b>      | <b>100% (700 cycles)<br/>2.0 A g<sup>-1</sup></b> | <b>This work</b> |

3

## 1 Reference:

- 2 [S1] Z. Luo, L. Liu, J. Ning, K. Lei, Y. Lu, F. Li, J. Chen, A microporous covalent-  
3 organic framework with abundant accessible carbonyl groups for lithium-ion  
4 batteries, *Angew. Chem. Int. Ed.*, 2018, **57**, 9443.
- 5 [S2] G. Kresse, J. Furthmüller, Efficiency of ab-initio total energy calculations for  
6 metals and semiconductors using a plane-wave basis set *Comput. Mater. Sci.*, 1996,  
7 **6**, 15-50.
- 8 [S3] G. Kresse, J. Furthmüller, Efficient iterative schemes for ab initio total-energy  
9 calculations using a plane-wave basis set, *Phys. Rev. B*, 1996, **54**, 11169.
- 10 [S4] J. P. Perdew, K. Burke, M. Ernzerhof, Generalized gradient approximation made  
11 simple, *Phys. Rev. Lett.*, 1996, **77**, 3865.
- 12 [S5] J. P. Perdew, Y. Wang, Pair-distribution function and its coupling-constant  
13 average for the spin-polarized electron gas, *Phys. Rev. B*, 1992, 46, 12947.
- 14 [S6] Y. Chen, Q. Zhu, K. Fan, Y. Gu, M. Sun, Z. Li, C. Zhang, Y. Wu, Q. Wang, S.  
15 Xu, J. Ma, C. Wang, W. Hu, Successive storage of cations and anions by ligands  
16 of  $\pi$ -d-conjugated coordination polymers enabling robust sodium-ion batteries,  
17 *Angew. Chem. Int. Ed.*, 2021, **133**, 18917-18924.
- 18 [S7] Y. Zhang, S. Yang, X. Chang, H. Guo, Y. Li, M. Wang, W. Li, L. Jiao, Y. Wang,  
19 MOF based on a longer linear ligand: electrochemical performance, reaction  
20 kinetics, and use as a novel anode material for sodium-ion batteries, *Chem.*  
21 *Commun.*, 2018, **54**, 11793-11796.
- 22 [S8] Y. Wu, Y. Chen, M. Tang, S. Zhou, C. Jiang, S. Zhou, C. Wang, A highly  
23 conductive conjugated coordination polymer for fast-charge sodium-ion batteries:  
24 reconsidering its structures, *Chem. Commun.*, 2019, **55**, 10856-10859.
- 25 [S9] K. Fan, J. Li, Y. Xu, C. Fu, Y. Chen, C. Zhang, G. Zhang, J. Ma, T. Zhai, C. Wang,  
26 Single crystals of a Highly conductive three-dimensional conjugated coordination  
27 polymer, *J. Am. Chem. Soc.*, 2023, **145**, 12682-12690.
- 28 [S10] C. Fang, Y. Huang, L. Yuan, Y. Liu, W. Chen, Y. Huang, K. Chen, J. Han, Q.  
29 Liu, Y. Huang, A metal-organic compound as cathode material with superhigh  
30 capacity achieved by reversible cationic and anionic redox chemistry for high-  
31 energy sodium-ion batteries, *Angew. Chem. Int. Ed.*, 2017, **129**, 6897-6901.
- 32 [S11] K. Fan, C. Zhang, Y. Chen, G. Zhang, Y. Wu, J. Zhou and C. Wang, Regulating  
33 the metal nodes of 1D conjugated coordination polymers for enhancing the  
34 performance of sodium-ion batteries, *J. Mater. Chem. C*, 2022, **10**, 2592-2599.
- 35 [S12] L. Cheng, J. Yu, L. Chen, J. Chu, J. Wang, H. G. Wang, D. Feng, F. Cui, G. Zhu,  
36 Immobilizing quinone-fused aza-phenazine into  $\pi$ -d conjugated coordination  
37 polymers with multiple-active sites for sodium-ion batteries, *Small*, 2023, **35**,  
38 2301578.
- 39 [S13] B. Wang, J. Li, M. Ye, Y. Zhang, Y. Tang, X. Hu, J. He and C. C. Li, Dual-redox  
40 sites guarantee high-capacity sodium storage in two-dimension conjugated metal-  
41 organic frameworks, *Adv. Funct. Mater.*, 2022, **32**, 2112072.



- 1 [S14] J. Park, M. Lee, D. Feng, Z. Huang, A. C. Hinckley, A. Yakovenko, X. Zou, Y.  
2 Cui, Z. Bao, Stabilization of hexaaminobenzene in a 2D conductive metal-organic  
3 framework for high power sodium storage, *J. Am. Chem. Soc.*, 2018, **140**, 10315-  
4 10323.
- 5 [S15] J. Lee, Y. Kim, S. Park, K. H. Shin, G. Jang, M. J. Hwang, D. Kim, K. A. Min,  
6 H. S. Park, B. Han, D. K. P. Ng, L. Y. S. Lee, Sodium-coordinated polymeric  
7 phthalocyanines as stable high-capacity organic anodes for sodium-ion batteries,  
8 *Energy Environ. Mater.*, 2023, **4**, e12468.
